# Supplementary material for: Validation of the Adherence Barriers Questionnaire – an instrument for identifying potential risk factors associated with medication-related non-adherence
Source: BMC Health Serv Res. 2015 Apr 10;15:153. doi: 10.1186/s12913-015-0809-0 (PMC4422301; doi:10.1186/s12913-015-0809-0)
Supplement: Additional file 1: — Overview – Review of literature regarding factors associated with medication related NA (2008–2010); the table shows the results of the conducted review of the literature in 2008–2010 with regards to reasons of non-adherence. [file 12913_2015_809_MOESM1_ESM.pdf]

Additional file 1: Overview – Review of literature regarding factors associated with medication related non-adherence (2008-2010)

| Author(s)             | Year | Sample                                                 | Design                                                                           | Patient related factors                      |                 |                                 |          |                                                               |                    | Medication related factors   | Influence on NA                                | Health care system related factors      | Influence on NA                            |                 |
|-----------------------|------|--------------------------------------------------------|----------------------------------------------------------------------------------|----------------------------------------------|-----------------|---------------------------------|----------|---------------------------------------------------------------|--------------------|------------------------------|------------------------------------------------|-----------------------------------------|--------------------------------------------|-----------------|
|                       |      |                                                        |                                                                                  | Socio-demographic                            | Influence on NA | Unintentional                   |          | Influence on NA                                               | Intentional        |                              |                                                |                                         |                                            | Influence on NA |
| Amberbir A et al.     | 2008 | 383 patients with HIV/AIDS                             | Prospective observational study with structured interviews                       | Social support                               | Decrease        | Depression                      |          | Increase                                                      | Use of memory aids |                              | Decrease                                       |                                         |                                            |                 |
|                       |      |                                                        |                                                                                  |                                              |                 | Forgetfulness                   |          | Increase                                                      | Feeling bad        |                              | Increase                                       |                                         |                                            |                 |
| Campos LN et al.      | 2008 | 293 patients with HIV/AIDS                             | Observational study                                                              |                                              |                 | Severe anxiety / Depression     |          | Increase                                                      |                    |                              |                                                |                                         |                                            |                 |
| Chambers S et al.     | 2008 | 75 patients with SLE                                   | Cross-sectional study with written questionnaires and semi-structured interviews |                                              |                 |                                 |          | Conscious decision to not take medication due to side effects |                    | Increase                     |                                                | High cost of/poor access to medications | Increase                                   |                 |
|                       |      |                                                        |                                                                                  |                                              |                 |                                 |          | Perception / belief of a low severity of disease              |                    | Increase                     |                                                |                                         |                                            |                 |
|                       |      |                                                        |                                                                                  |                                              |                 |                                 |          | reference to take drugs only when symptomatic                 |                    | Increase                     |                                                |                                         |                                            |                 |
| Colombi AM et al.     | 2008 | 2.052 patients with DM2 (oral antidiabetics)           | Investigation based on administrative data                                       |                                              |                 |                                 |          |                                                               |                    |                              |                                                | Higher copayments                       | Increase                                   |                 |
| Ingersoll KS, Cohen J | 2008 | patients with chronic diseases                         | Review                                                                           |                                              |                 |                                 |          |                                                               |                    | Complex (dosing) regime      |                                                | Increase                                |                                            |                 |
| Jakubowiak WM et al.  | 2008 | 1.389 patients with TB                                 | Cross-sectional study with written questionnaires                                | Female gender                                | Decrease        | Negative emotional state        | Increase | Lack of disease awareness (think of themselves as not ill)    |                    | Increase                     |                                                |                                         |                                            |                 |
|                       |      |                                                        |                                                                                  | Unemployment                                 | Increase        |                                 |          | Unawareness regarding treatment duration                      |                    | Increase                     |                                                |                                         |                                            |                 |
|                       |      |                                                        |                                                                                  | Previous detention                           | Increase        |                                 |          | Aversion to medical personnel                                 |                    | Increase                     |                                                |                                         |                                            |                 |
|                       |      |                                                        |                                                                                  |                                              |                 |                                 |          | No belief in recovery                                         |                    | Increase                     |                                                |                                         |                                            |                 |
| Karamanidou C et al.  | 2008 | Patients with kidney disease (ERSD)                    | Review                                                                           | Older age                                    | Decrease        | Depression                      | Increase | Lack of disease knowledge                                     |                    | Increase                     | Complex (dosing) regime                        | Increase                                |                                            |                 |
|                       |      |                                                        |                                                                                  |                                              |                 |                                 |          | Lower self-efficacy                                           |                    | Increase                     |                                                |                                         |                                            |                 |
|                       |      |                                                        |                                                                                  |                                              |                 |                                 |          | Lack of awareness about the importance / necessity of therapy |                    | Increase                     |                                                |                                         |                                            |                 |
|                       |      |                                                        |                                                                                  |                                              |                 |                                 |          | Fear of side effects                                          |                    | Increase                     |                                                |                                         |                                            |                 |
| Lacey J et al.        | 2008 | Patients with glaucoma                                 | Cross-sectional study with "home-based" semi-structured interviews               | Lower level of education                     | Increase        | Forgetfulness                   | Increase | Lack of motivation                                            |                    | Increase                     | Application difficulties (especially in drops) | Increase                                |                                            |                 |
|                       |      |                                                        |                                                                                  |                                              |                 |                                 |          | Lack of belief in the efficacy of the drugs                   |                    | Increase                     |                                                |                                         |                                            |                 |
|                       |      |                                                        |                                                                                  |                                              |                 |                                 |          | Fear of illness consequences (blindness)                      |                    | Decrease                     |                                                |                                         |                                            |                 |
| Liang SY et al.       | 2008 | 92 cancer patients                                     | Cross-sectional study with written questionnaires                                |                                              |                 |                                 |          | Opioid-taking self-efficacy                                   |                    | Decrease                     |                                                |                                         |                                            |                 |
| Muyingo SK et al.     | 2008 | 2.957 patients with HIV/AIDS                           | Observational study (Pill-Count / Self-Report)                                   | Self-Report: only one regular sexual partner | Decrease        |                                 |          |                                                               |                    | Previous duration of therapy |                                                | Increase                                | Treating center                            |                 |
| Park JH et al.        | 2008 | 2.455.193 patients with hypertonia                     | Investigation based on administrative data                                       | Female gender                                | Increase        |                                 |          |                                                               |                    |                              |                                                |                                         | Increasing number of different prescribers | Increase        |
|                       |      |                                                        |                                                                                  | Older age                                    | Decrease        |                                 |          |                                                               |                    |                              |                                                |                                         |                                            |                 |
|                       |      |                                                        |                                                                                  | Region (city to rural and very rural area)   | Increase        |                                 |          |                                                               |                    |                              |                                                |                                         |                                            |                 |
| Santos Pde M et al.   | 2008 | 158 patients with severe asthma                        | Prospective cohort study                                                         | Lower financial resources                    | Increase        |                                 |          |                                                               |                    | Side effects                 |                                                | Increase                                | Length distance to the treating center     | Increase        |
| Stoehr GP et al.      | 2008 | 343 chronically ill patients with an age of ≥ 65 years | Cross-sectional survey                                                           |                                              |                 | Forgetfulness                   |          | Increase                                                      |                    |                              | Number of taken drugs (> 4 drugs)              | Increase                                |                                            |                 |
|                       |      |                                                        |                                                                                  |                                              |                 | Cognitive functional impairment |          | Increase                                                      |                    |                              |                                                |                                         |                                            |                 |

Legend: The table summarized the results of the conducted review analyzing the existing literature with regards to predictors of medication-related non-adherence (2008-2010). The conducted review is based on a systematic database search (MEDLINE) referring to the related topic in German and English literature of the period from January 2008 to March 2013. The following search terms were used: Adherence [AND] factors (281 hits), Adherence [AND] factor (30 hits), Adherence [AND] predictors (148 hits), Adherence [AND] predictor (11 hits), Adherence [AND] causes (8 hits), Adherence [AND] cause (11 hits), Adherence [AND] barriers (107 hits), Adherence [AND] barrier (7 hits). After removal of duplicates using the database ID (PMID) 597 articles were included in the first qualifying examination. Within this first examination, studies analyzing the adherence of children, dealing with the adherence of physicians in terms of recommended guidelines or relating to the non-adherence to therapy in terms of diet plans, exercise / sports programs, smoking cessation programs or other non-medication therapies were excluded. Finally, 105 articles were included in the review.

Additional file 1: Overview – Review of literature regarding factors associated with medication related non-adherence (2008-2010)

| Author(s)             | Year | Sample                                       | Design                                                          | Patient related factors                   |                 |                         |                 |                                                                                  |                 | Medication related factors | Influence on NA | Health care system related factors                  | Influence on NA |
|-----------------------|------|----------------------------------------------|-----------------------------------------------------------------|-------------------------------------------|-----------------|-------------------------|-----------------|----------------------------------------------------------------------------------|-----------------|----------------------------|-----------------|-----------------------------------------------------|-----------------|
|                       |      |                                              |                                                                 | Socio-demographic                         | Influence on NA | Unintentional           | Influence on NA | Intentional                                                                      | Influence on NA |                            |                 |                                                     |                 |
| Valeberg BT et al.    | 2008 | 174 cancer patients                          | Cross-sectional study with written questionnaires               | Female gender                             | Increase        |                         |                 | Increasing pain and / or increasing perception of pain relief through medication | NA senkend      |                            |                 |                                                     |                 |
| Wu JR et al.          | 2008 | 134 patients with heart failure              | Prospective observational study                                 | Social support                            | NA senkend      |                         |                 |                                                                                  |                 |                            |                 |                                                     |                 |
|                       |      |                                              |                                                                 | Financial status                          | n. s.           |                         |                 |                                                                                  |                 |                            |                 |                                                     |                 |
|                       |      |                                              |                                                                 | Ethnicity                                 | n. s.           |                         |                 |                                                                                  |                 |                            |                 |                                                     |                 |
| Fransen GA et al.     | 2009 | 347 patients with dyspepsia                  | Prospective observational study                                 | Lower level of education                  | Increase        | Forgetfulness           | Increase        | Lower self-efficacy                                                              | Increase        |                            |                 |                                                     |                 |
| Friedman DS et al.    | 2009 | 196 patients with glaucoma                   | Prospective observational study                                 | Younger age (< 50)                        | Increase        | Depression              | Increase        |                                                                                  |                 |                            |                 |                                                     |                 |
|                       |      |                                              |                                                                 | Older age (> 80)                          | Increase        |                         |                 |                                                                                  |                 |                            |                 |                                                     |                 |
|                       |      |                                              |                                                                 | African-American                          | Increase        |                         |                 |                                                                                  |                 |                            |                 |                                                     |                 |
|                       |      |                                              |                                                                 | Lower income                              | Increase        |                         |                 |                                                                                  |                 |                            |                 |                                                     |                 |
| Lee Y et al.          | 2009 | 480 patients with DM                         | Cross-sectional survey                                          |                                           |                 |                         |                 |                                                                                  |                 |                            |                 | Trust in treating physician                         | Decrease        |
| Mann DM et al.        | 2009 | 151 patients with DM                         | Cross-sectional survey                                          |                                           |                 |                         |                 | Lack of awareness of the chronic nature of the disease                           | Increase        | Application difficulties   | Increase        |                                                     |                 |
|                       |      |                                              |                                                                 |                                           |                 |                         |                 | Belief, medication must be used only when the glucose value is high              | Increase        |                            |                 |                                                     |                 |
|                       |      |                                              |                                                                 |                                           |                 |                         |                 | Fear of side effects                                                             | Increase        |                            |                 |                                                     |                 |
|                       |      |                                              |                                                                 |                                           |                 |                         |                 | Low self-confidence with respect to the control of the DM                        | Increase        |                            |                 |                                                     |                 |
| Mulgund M et al.      | 2009 | 111 patients with osteoporosis               | Follow-up-study (NA-Self-Report / patient chart review)         |                                           |                 |                         |                 | Lack of awareness of treatment benefits                                          | Increase        | Side effects               | Increase        | High costs                                          | Increase        |
| Ngoh LN               | 2009 | patients with chronic diseases               | Review                                                          |                                           |                 | Limited Health Literacy | Increase        |                                                                                  |                 |                            |                 |                                                     |                 |
| Nguyen GC et al.      | 2009 | 235 patients with inflammatory bowel disease | Cross-sectional survey                                          | Older age                                 | Decrease        |                         |                 |                                                                                  |                 |                            |                 | Trust-in-physician                                  | Decrease        |
|                       |      |                                              |                                                                 | Poorer HrQoL                              | Increase        |                         |                 |                                                                                  |                 |                            |                 |                                                     |                 |
|                       |      |                                              |                                                                 | Black race                                | Increase        |                         |                 |                                                                                  |                 |                            |                 |                                                     |                 |
| Nichol MB et al.      | 2009 | 5.943 patients with hypertonia               | Investigation based on administrative data                      | African-American                          | Increase        |                         |                 |                                                                                  |                 |                            |                 | No Medicare eligibility                             | Increase        |
| Protopopescu C et al. | 2009 | 1.100 patients with HIV/AIDS                 | Follow-up-study (written questionnaires / patient chart review) | Older age                                 | Decrease        | Depression              | Increase        |                                                                                  |                 |                            |                 |                                                     |                 |
|                       |      |                                              |                                                                 | Increasing duration since first diagnosis | Increase        | alcoholism              | Increase        |                                                                                  |                 |                            |                 |                                                     |                 |
|                       |      |                                              |                                                                 | Lack of social support                    | Increase        |                         |                 |                                                                                  |                 |                            |                 |                                                     |                 |
| Quach PL et al.       | 2009 | 547 patients with schizophrenia              | Prospective observational study                                 | Lack of family support                    | Increase        | Drug dependence         | Increase        | Negative attitude to drugs                                                       | Increase        |                            |                 |                                                     |                 |
|                       |      |                                              |                                                                 | Older age                                 | Decrease        |                         |                 | Lack of belief in the efficacy of the drugs                                      | Increase        |                            |                 |                                                     |                 |
| Shah NR et al.        | 2009 | 3.200 newly treated patients with hypertonia | Retrospective cohort study                                      | Female gender                             | Increase        |                         |                 |                                                                                  |                 | Number of taken drugs      | Increase        | Copayments                                          | Increase        |
|                       |      |                                              |                                                                 | Older age                                 | Increase        |                         |                 |                                                                                  |                 |                            |                 |                                                     |                 |
|                       |      |                                              |                                                                 | Lower "baseline" blood pressure           | Increase        |                         |                 |                                                                                  |                 |                            |                 |                                                     |                 |
|                       |      |                                              |                                                                 | Increasing number of comorbidities        | Increase        |                         |                 |                                                                                  |                 |                            |                 |                                                     |                 |
| Shah NR et al.        | 2009 | 1.132 newly treated patients with DM         | Retrospective cohort study                                      | A1c > 9%                                  | Decrease        |                         |                 |                                                                                  |                 |                            |                 | Copayments ≥ 10 \$                                  | Increase        |
| Tanioka D et al.      | 2009 | 363 patients with HCV                        | Prospective observational study                                 | Older age (≥ 55)                          | Increase        |                         |                 |                                                                                  |                 |                            |                 | Increasing center size (number of treated patients) | Decrease        |
|                       |      |                                              |                                                                 | Female gender                             | Increase        |                         |                 |                                                                                  |                 |                            |                 |                                                     |                 |

Additional file 1: Overview – Review of literature regarding factors associated with medication related non-adherence (2008-2010)

| Author(s)              | Year | Sample                                            | Design                                                        | Patient related factors   |                 |                                                         |                 |                                                                               |                 | Medication related factors                                | Influence on NA | Health care system related factors                       | Influence on NA |
|------------------------|------|---------------------------------------------------|---------------------------------------------------------------|---------------------------|-----------------|---------------------------------------------------------|-----------------|-------------------------------------------------------------------------------|-----------------|-----------------------------------------------------------|-----------------|----------------------------------------------------------|-----------------|
|                        |      |                                                   |                                                               | Socio-demographic         | Influence on NA | Unintentional                                           | Influence on NA | Intentional                                                                   | Influence on NA |                                                           |                 |                                                          |                 |
| Treadaway K et al.     | 2009 | 708 patients with MS                              | Prospective observational study (with internet based surveys) |                           |                 | Forgetfulness                                           | Increase        |                                                                               |                 | Side effects (specifically injection-related irritations) | Increase        |                                                          |                 |
| Turner BJ et al.       | 2009 | 202 patients with hypertonia                      | Cross-sectional survey (phone interviews)                     |                           |                 | Depression                                              | Increase        |                                                                               |                 |                                                           |                 | Deficiencies with respect to doctor-patient-relationship | Increase        |
| Turner AP et al.       | 2009 | 89 patients with MS                               | Follow-up-study with monthly phone interviews                 |                           |                 | Strength of MS-related physical impairment / disability | Increase        | Lack of disease knowledge                                                     | Increase        | Type of disease modifying therapy                         | n. s.           |                                                          |                 |
| Vawter L et al.        | 2008 | 1.432 patients with hypertonia                    | Cross-sectional survey                                        | Older age                 | Decrease        | Forgetfulness                                           | Increase        | Belief that one does not need the medication                                  | Increase        | Side effects                                              | Increase        | Copayments                                               | Increase        |
|                        |      |                                                   |                                                               | Lower income              | Increase        | Mental function impairment                              | Increase        |                                                                               |                 |                                                           |                 | Lack of insurance coverage                               | Increase        |
| Chan DC et al.         | 2010 | 14.257 patients with first prescription of statin | Investigation based on administrative data                    | Female gender             | Increase        |                                                         |                 |                                                                               |                 |                                                           |                 |                                                          |                 |
|                        |      |                                                   |                                                               | Older age                 | Decrease        |                                                         |                 |                                                                               |                 |                                                           |                 |                                                          |                 |
|                        |      |                                                   |                                                               | Lower income              | Increase        |                                                         |                 |                                                                               |                 |                                                           |                 |                                                          |                 |
| Glass TR et al.        | 2010 | 6.709 patients with HIV                           | Follow-up-study with written questionnaires                   | Older age                 | Decrease        | Depression                                              | Increase        |                                                                               |                 | Complex (dosing) regime                                   | Increase        | Change of doctor                                         | Increase        |
|                        |      |                                                   |                                                               | Lower level of education  | Increase        | Regular alcohol consumption                             | Increase        |                                                                               |                 |                                                           |                 |                                                          |                 |
| Laforest L et al.      | 2010 | 179 patients with COPD                            | Cross-sectional survey                                        |                           |                 | Forgetfulness                                           | Increase        |                                                                               |                 | Poly-pharmacy                                             | Increase        |                                                          |                 |
| Novick D et al.        | 2010 | 6.731 patients with schizophrenia                 | Prospective observational study                               |                           |                 | alcoholism / drug addiction                             | Increase        | Hostility                                                                     | Increase        |                                                           |                 |                                                          |                 |
| O'Carroll R et al.     | 2010 | 180 patients after stroke                         | Follow-up-study with written questionnaires                   | Older age                 | Decrease        | Cognitive impairments                                   | Increase        | Concerns / doubts regarding medication                                        | Increase        |                                                           |                 |                                                          |                 |
|                        |      |                                                   |                                                               |                           |                 |                                                         |                 | Lack of conviction regarding the benefits of therapy                          | Increase        |                                                           |                 |                                                          |                 |
| Park KA et al.         | 2010 | 265 patients with DM                              | Cross-sectional survey                                        | Lower financial resources | Decrease        |                                                         |                 | Low self-efficacy                                                             | Increase        |                                                           |                 |                                                          |                 |
|                        |      |                                                   |                                                               |                           |                 |                                                         |                 | Low awareness about the severity of the disease (esp. diabetes complications) | Increase        |                                                           |                 |                                                          |                 |
| Shigemura J et al.     | 2010 | 1.151 patients with depression                    | Internet based cross-sectional survey                         | Older age                 | Decrease        |                                                         |                 | Lower satisfaction with the medication                                        | Increase        | Increasing daily dosing frequency                         | Increase        | Poor doctor-patient-relationship                         | Increase        |
| Solomon DH et al.      | 2010 | 142 female patients with osteoporosis             | 1-year follow-up-study with written questionnaires            |                           |                 | Regular alcohol consumption                             | Increase        | Anxiety / concerns regarding side effects                                     | Increase        |                                                           |                 |                                                          |                 |
|                        |      |                                                   |                                                               |                           |                 |                                                         |                 | Believes that too many drugs must be taken                                    | Increase        |                                                           |                 |                                                          |                 |
|                        |      |                                                   |                                                               |                           |                 |                                                         |                 | Low awareness about the severity of the disease                               | Increase        |                                                           |                 |                                                          |                 |
|                        |      |                                                   |                                                               |                           |                 |                                                         |                 | Lack of belief in the efficacy of the drugs                                   | Increase        |                                                           |                 |                                                          |                 |
| Souza-Machado A et al. | 2010 | 160 patients with severe asthma                   | Follow-up-study                                               | Lower financial resources | Increase        |                                                         |                 |                                                                               |                 | Side effects                                              | Increase        | Length distance to the treating center                   | Increase        |
|                        |      |                                                   |                                                               |                           |                 |                                                         |                 |                                                                               |                 | Complex (dosing) regime                                   | Increase        |                                                          |                 |
