# Supplementary material for: Validation of the Adherence Barriers Questionnaire – an instrument for identifying potential risk factors associated with medication-related non-adherence
Source: BMC Health Serv Res. 2015 Apr 10;15:153. doi: 10.1186/s12913-015-0809-0 (PMC4422301; doi:10.1186/s12913-015-0809-0)
Supplement: Additional file 2: — Overview – Review of literature regarding factors associated with medication related NA (2011–2013); the table shows the results of the conducted review of the literature in 2011–2013 with regards to reasons of non-adherence. [file 12913_2015_809_MOESM2_ESM.pdf]

## Additional file 2: Overview – Review of literature regarding factors associated with medication related non-adherence (2011-2013)

| Author(s)                | Year | Sample                                          | Design                                                  | Patient related factors       |                 |                                              |                 |                                                              |                 | Medication related factors     | Influence on NA | Health care system related factors             | Influence on NA |
|--------------------------|------|-------------------------------------------------|---------------------------------------------------------|-------------------------------|-----------------|----------------------------------------------|-----------------|--------------------------------------------------------------|-----------------|--------------------------------|-----------------|------------------------------------------------|-----------------|
|                          |      |                                                 |                                                         | Socio-demographic             | Influence on NA | Unintentional                                | Influence on NA | Intentional                                                  | Influence on NA |                                |                 |                                                |                 |
| Agh T et al.             | 2011 | 170 patients with COPD                          | Cross-sectional survey                                  | Age                           | n. s.           |                                              |                 |                                                              |                 | Complex (dosing) regime        | Increase        |                                                |                 |
| Baltazary G et al.       | 2011 | 197 patients with HIV/AIDS and 30 physicians    | "Face-to-face"-Interviews                               | Stigmatization                | Increase        | Forgetfulness                                | Increase        | Lack of awareness of the disease                             | Increase        | Side effects                   | Increase        | Higher copayments / costs                      | Increase        |
| Ben-Natan M et al.       | 2011 | 207 older patients with long-term medication    | Cross-sectional survey                                  |                               |                 |                                              |                 |                                                              |                 |                                |                 | Satisfaction with treating physician           | Decrease        |
| Bird GC et al.           | 2011 | Physicians                                      | Cross-sectional survey                                  | Older age                     | Increase        |                                              |                 | Lack of disease knowledge                                    | Increase        |                                |                 | Higher costs                                   | Increase        |
|                          |      |                                                 |                                                         |                               |                 |                                              |                 | Lack of awareness of the need of therapy                     | Increase        |                                |                 |                                                |                 |
| Borgsteede SD et al.     | 2011 | 20 patients with DM2                            | Semi-structured interviews                              | Lack of social support        | Increase        |                                              |                 | Experience with the medication combined with a daily routine | Decrease        | Complex (dosing) regime        | Increase        |                                                |                 |
| Chamroonsawasdi K et al. | 2011 | 230 patients with HIV/AIDS                      | Cross-sectional survey                                  | Familiarly support            | Decrease        |                                              |                 | Lack of disease knowledge                                    | Increase        | Side effects                   | Increase        |                                                |                 |
|                          |      |                                                 |                                                         |                               |                 |                                              |                 | Lack of awareness of disease severity                        | Increase        |                                |                 |                                                |                 |
| Daley DJ et al.          | 2011 | 772 patients with Parkinson                     | Review                                                  | Older age                     | Decrease        | Affective disorder                           | Increase        | Lack of awareness of the disease                             | Increase        | Complex regime / poly-pharmacy | Increase        |                                                |                 |
|                          |      |                                                 |                                                         | Longer duration of disease    | Increase        |                                              |                 | Lack of disease knowledge                                    | Increase        |                                |                 |                                                |                 |
|                          |      |                                                 |                                                         | Lack of social environment    | Increase        |                                              |                 |                                                              |                 |                                |                 |                                                |                 |
| Gellad WF et al.         | 2011 | Older patients with long-term medication        | Review                                                  |                               |                 | Cognitive impairment                         | Increase        | Lack of disease knowledge                                    | Increase        | Side effects                   | Increase        | Good Physician-patient-relationship            | Decrease        |
|                          |      |                                                 |                                                         |                               |                 |                                              |                 |                                                              |                 | poly-pharmacy                  | Increase        |                                                |                 |
| Iversen MD et al.        | 2011 | 32 patients with osteoporosis, 11 GPs, 1 nurses | Focus group interviews                                  |                               |                 | Difficulties to remember taking instructions | Increase        | Lack of disease knowledge                                    | Increase        | Side effects                   | Increase        | dissatisfaction with the doctor /consultation  | Increase        |
| James BO et al.          | 2011 | 137 patients with mental illness                | Cross-sectional study with written questionnaires       | Stigmatization                | Increase        |                                              |                 |                                                              |                 | Complex (dosing) regime        | Increase        |                                                |                 |
| Kim JH et al.            | 2011 | 204 Warfarin patients                           | Cross-sectional survey                                  |                               |                 |                                              |                 | Lack of disease knowledge                                    | Increase        |                                |                 |                                                |                 |
|                          |      |                                                 |                                                         |                               |                 |                                              |                 | Lower self-efficacy                                          | Increase        |                                |                 |                                                |                 |
| Krousel-Wood M et al.    | 2011 | 1.965 patients with hypertension                | Cohort Study of Medication Adherence Among Older Adults | Female gender                 | Decrease        | Depression                                   | Increase        |                                                              |                 |                                |                 |                                                |                 |
|                          |      |                                                 |                                                         | Being married                 | Decrease        | Stressful life                               | Increase        |                                                              |                 |                                |                 |                                                |                 |
| Kyser M et al.           | 2011 | 528 patients with HIV/AIDS                      | Multicenter, prospective cohort study                   | Ethnicity (nonwhite)          | Increase        | Regular alcohol consumption                  | Increase        |                                                              |                 |                                |                 |                                                |                 |
|                          |      |                                                 |                                                         | Unemployment                  | Increase        |                                              |                 |                                                              |                 |                                |                 |                                                |                 |
|                          |      |                                                 |                                                         | Duration of disease           | Increase        |                                              |                 |                                                              |                 |                                |                 |                                                |                 |
| Mauskop A et al.         | 2011 | Statin-therapy                                  | Review                                                  | Comorbidities                 | Increase        |                                              |                 |                                                              |                 | Side effects                   | Increase        | Good guideline adherence of treating physician | Decrease        |
|                          |      |                                                 |                                                         |                               |                 |                                              |                 |                                                              |                 |                                |                 | Higher costs                                   | Increase        |
| Muntner P et al.         | 2011 | 284 patients after PCI (Clopidogrel)            | Cross-sectional study with written questionnaires       |                               |                 | Difficulty to consult physician              | Increase        | Not be able to / dare to ask his doctor about instructions   | Increase        |                                |                 | Higher costs                                   | Increase        |
| Nair KV et al.           | 2011 | 2.451 patients with hypertonia (non-adherence)  | Phone interviews                                        |                               |                 | Forgetfulness                                | Increase        |                                                              |                 |                                |                 | Long distance to the treating center           | Increase        |
|                          |      |                                                 |                                                         |                               |                 | Difficulties to come to pharmacy             | Increase        |                                                              |                 |                                |                 |                                                |                 |
| Salt E et al.            | 2011 | 108 patients with rheumatoid arthritis          | Cross-sectional survey                                  | Ethnicity (nonwhite)          | Increase        |                                              |                 |                                                              |                 | Number of taken drugs          | Increase        |                                                |                 |
| Sedjo RL et al.          | 2011 | 13.593 patients with breast cancer              | Investigation based on administrative data              | Older age                     | Decrease        |                                              |                 |                                                              |                 |                                |                 | Higher copayments                              | Increase        |
|                          |      |                                                 |                                                         | Number of comorbidities (CCI) | Increase        |                                              |                 |                                                              |                 |                                |                 |                                                |                 |
| Valdeoriola F et al.     | 2011 | 418 Patients with Parkinson                     | Cross-sectional survey                                  | Being married                 | Decrease        | Psychiatric symptoms                         | Increase        | Lack of disease knowledge                                    | Increase        |                                |                 |                                                |                 |
|                          |      |                                                 |                                                         | Lower income                  | Increase        |                                              |                 |                                                              |                 |                                |                 |                                                |                 |
| Wakibi SN et al.         | 2011 | 403 patients with HIV/AIDS                      | "Face-to-face"-Interviews                               |                               |                 | Forgetfulness                                | Increase        |                                                              |                 | Complex (dosing) regime        | Increase        | Long distance to the treating center           | Increase        |

Legend: The table summarized the results of the conducted review analyzing the existing literature with regards to predictors of medication-related non-adherence (2011-2013). The conducted review is based on a systematic database search (MEDLINE) referring to the related topic in German and English literature of the period from January 2008 to March 2013. The following search terms were used: Adherence [AND] factors (281 hits), Adherence [AND] factor (30 hits), Adherence [AND] predictors (148 hits), Adherence [AND] predictor (11 hits), Adherence [AND] causes (8 hits), Adherence [AND] cause (11 hits), Adherence [AND] barriers (107 hits), Adherence [AND] barrier (7 hits). After removal of duplicates using the database ID (PMID) 597 articles were included in the first qualifying examination. Within this first examination, studies analyzing the adherence of children, dealing with the adherence of physicians in terms of recommended guidelines or relating to the non-adherence to therapy in terms of diet plans, exercise / sports programs, smoking cessation programs or other non-medication therapies were excluded. Finally, 105 articles were included in the review.

Additional file 2: Overview – Review of literature regarding factors associated with medication related non-adherence (2011-2013)

| Author(s)               | Year | Sample                                                                         | Design                                                      | Patient related factors                    |          |                             |               |                                                          |             | Medication related factors                | Influence on NA | Health care system related factors   |          | Influence on NA             |
|-------------------------|------|--------------------------------------------------------------------------------|-------------------------------------------------------------|--------------------------------------------|----------|-----------------------------|---------------|----------------------------------------------------------|-------------|-------------------------------------------|-----------------|--------------------------------------|----------|-----------------------------|
|                         |      |                                                                                |                                                             | Socio-demographic                          |          | Influence on NA             | Unintentional | Influence on NA                                          | Intentional |                                           |                 |                                      |          |                             |
| Wasti SP et al.         | 2011 | Patients with HIV/AIDS                                                         | Review                                                      | Stigmatization                             | Increase | Forgetfulness               | Increase      | Lack of self-efficacy                                    | Increase    | Side effects                              | Increase        |                                      |          |                             |
|                         |      |                                                                                | Financial problems                                          | Increase                                   |          |                             |               |                                                          |             |                                           |                 |                                      |          |                             |
|                         |      |                                                                                | Lack of social support                                      | Increase                                   |          |                             |               |                                                          |             |                                           |                 |                                      |          |                             |
| Bailey GR et al.        | 2012 | 59 patients with DM                                                            | Cross-sectional study with written questionnaires           | General poor health                        | Increase |                             |               |                                                          |             |                                           |                 | Higher costs                         | Increase |                             |
|                         |      |                                                                                | Low severity of the disease                                 | Increase                                   |          |                             |               |                                                          |             |                                           |                 |                                      |          |                             |
| Barraco A et al.        | 2012 | 650 patients with bipolar disorder                                             | Multicenter, prospective cohort study                       | Younger age                                | Increase | Regular alcohol consumption | Increase      | Negative attitudes to therapy                            | Increase    |                                           |                 |                                      |          |                             |
| Chisholm-Burns M et al. | 2012 | 512 patients after kidney transplantation (immunosuppressive)                  | Cross-sectional survey                                      | Older age (18-29 versus 46-64)             | Decrease | Forgetfulness               | Increase      | Belief in the need of therapy                            | Decrease    |                                           |                 |                                      |          |                             |
|                         |      |                                                                                |                                                             |                                            |          |                             |               | General dissatisfaction with life                        | Increase    |                                           |                 |                                      |          |                             |
| Cui Z et al.            | 2012 | 4.660 patients with fibromyalgia                                               | Investigation based on administrative data                  | Older age                                  | Decrease | Depression                  | Increase      |                                                          |             |                                           |                 |                                      |          |                             |
|                         |      |                                                                                |                                                             | Comorbidities                              | Increase |                             |               |                                                          |             |                                           |                 |                                      |          |                             |
| Dessie A et al.         | 2012 | 384 patients with hypertonia                                                   | Cross-sectional survey                                      | Number of comorbidities                    | Increase |                             |               | Lack of disease knowledge                                | Increase    |                                           |                 | Long distance to the treating center | Increase |                             |
|                         |      |                                                                                |                                                             |                                            |          |                             |               |                                                          |             |                                           |                 |                                      |          |                             |
| Devold HM et al.        | 2012 | 7.610 patients with osteoporosis                                               | Investigation based on administrative data                  | Older age (40-59 vs. 70-79); only in women | Decrease |                             |               |                                                          |             |                                           |                 |                                      |          |                             |
|                         |      |                                                                                |                                                             | Higher income; only in women               | Decrease |                             |               |                                                          |             |                                           |                 |                                      |          |                             |
|                         |      |                                                                                |                                                             | Higher level of education, only in men     | Decrease |                             |               |                                                          |             |                                           |                 |                                      |          |                             |
| Efficace F et al.       | 2012 | 413 patients with leukemia                                                     | Cross-sectional survey                                      | Lack of social support                     | Increase |                             |               | Lack of disease knowledge                                | Increase    | Burden of concomitant medication          | Increase        |                                      |          |                             |
|                         |      |                                                                                |                                                             |                                            |          |                             |               |                                                          |             |                                           |                 |                                      |          |                             |
| Fedrick F et al.        | 2012 | 272 patients with DM                                                           | Cross-sectional survey                                      |                                            |          | Regular alcohol consumption | Increase      |                                                          |             | Side effects                              | Increase        | Long distance to the treating center | Increase |                             |
| Origoryan L et al.      | 2012 | 176 patients with hypertonia                                                   | Secondary analysis of an RCT                                |                                            |          | Female gender               | Increase      |                                                          |             |                                           |                 |                                      |          | Public health care provider |
|                         |      |                                                                                |                                                             | African-American                           | Increase |                             |               |                                                          |             |                                           |                 |                                      |          |                             |
| Huetsch JC et al.       | 2012 | 2.730 patients with COPD                                                       | Investigation based on administrative data                  |                                            |          |                             |               | Previous adherence to other medication class             | Decrease    |                                           |                 |                                      |          |                             |
|                         |      |                                                                                |                                                             |                                            |          |                             |               |                                                          |             |                                           |                 |                                      |          |                             |
| Karakurt P et al.       | 2012 | 750 patients with hypertonia                                                   | Cross-sectional study with written questionnaires           | Lack of social environment                 | Increase | Forgetfulness               | Increase      | Lack of disease knowledge                                | Increase    |                                           |                 | Higher copayments / costs            | Increase |                             |
|                         |      |                                                                                |                                                             |                                            |          | Carelessness                | Increase      |                                                          |             |                                           |                 |                                      |          |                             |
| Khdour MR et al.        | 2012 | 173 patients with COPD                                                         | "Face-to-Face"-Interviews and patient chart review          | Number of comorbidities                    | Increase | Depression                  | Increase      | Lack of belief in the efficacy of the drugs              | Increase    |                                           |                 |                                      |          |                             |
|                         |      |                                                                                |                                                             |                                            |          |                             | Increase      | Lower self-efficacy                                      | Increase    |                                           |                 |                                      |          |                             |
| Lamba S et al.          | 2012 | 281 patients after kidney transplantation (immunosuppressive)                  | Cross-sectional study with written questionnaires via Email | Be divorced                                | Increase | Previous alcoholism         | Increase      |                                                          |             |                                           |                 |                                      |          |                             |
|                         |      |                                                                                |                                                             |                                            |          | Mental problems             | Increase      |                                                          |             |                                           |                 |                                      |          |                             |
| Lewis LM                | 2012 | Afro-Americans with hypertonia                                                 | Review                                                      |                                            |          | Depression                  | Increase      | Lower self-efficacy                                      | Increase    |                                           |                 | Good doctor-patient communication    | Decrease |                             |
|                         |      |                                                                                |                                                             |                                            |          |                             |               |                                                          |             |                                           |                 |                                      |          |                             |
| Lewis LM et al.         | 2012 | 253 patients with hypertonia                                                   | Secondary analysis of an RCT                                | Age                                        | n. s.    | Depression                  | Increase      | Lower self-efficacy                                      | Increase    |                                           |                 |                                      |          |                             |
| Li WW et al.            | 2012 | 200 patients with hypertonia                                                   | Cross-sectional survey                                      | Longer duration of disease                 | Increase |                             |               | Lower perception of susceptibility to diseases           | Increase    |                                           |                 |                                      |          |                             |
| Magura S et al.         | 2012 | 131 patients with mental illness (bipolar disorder, depression, schizophrenia) | "Face-to-face"-Interviews                                   | Lack of social support                     | Increase |                             |               |                                                          |             | Dissatisfaction with medication / therapy | Increase        | Side effects                         | Increase |                             |
|                         |      |                                                                                |                                                             |                                            |          | Lower self-efficacy         | Increase      |                                                          |             |                                           |                 |                                      |          |                             |
| Morales JM et al.       | 2012 | 1.983 patients after kidney transplantation (immunosuppressive)                | Cross-sectional survey                                      |                                            |          |                             |               | Perception that one's life is disturbed by the treatment | Increase    | Complex (dosing) regime                   | Increase        |                                      |          |                             |
| Murata A et al.         | 2012 | 151 patients with depression                                                   | Cross-sectional survey                                      |                                            |          |                             |               | Type of depression                                       | -           |                                           |                 |                                      |          | Side effects                |
| O'Neil CR et al.        | 2012 | 556 patients with HIV/AIDS                                                     | Longitudinal cohort study                                   | Higher age                                 | Decrease | Drug addiction              | Increase      |                                                          |             |                                           |                 |                                      |          |                             |
|                         |      |                                                                                |                                                             | Female gender                              | Increase |                             |               |                                                          |             |                                           |                 |                                      |          |                             |
|                         |      |                                                                                |                                                             | Low income                                 | Increase |                             |               |                                                          |             |                                           |                 |                                      |          |                             |

## Additional file 2: Overview – Review of literature regarding factors associated with medication related non-adherence (2011-2013)

| Author(s)                | Year | Sample                                                | Design                                                                                | Patient related factors      |                    |                             |                 |                                                               |                 | Medication related factors          | Influence on NA                      | Health care system related factors                                  | Influence on NA |
|--------------------------|------|-------------------------------------------------------|---------------------------------------------------------------------------------------|------------------------------|--------------------|-----------------------------|-----------------|---------------------------------------------------------------|-----------------|-------------------------------------|--------------------------------------|---------------------------------------------------------------------|-----------------|
|                          |      |                                                       |                                                                                       | Socio-demographic            | Influence on NA    | Unintentional               | Influence on NA | Intentional                                                   | Influence on NA |                                     |                                      |                                                                     |                 |
| Peyrot M et al.          | 2012 | 1.530 patients with DM and 1.250 physicians           | Internet-based cross-sectional survey of physician and phone interviews with patients |                              |                    | Stress/emotional problems   | Increase        | Too busy with other things                                    | Increase        |                                     |                                      |                                                                     |                 |
|                          |      |                                                       |                                                                                       |                              |                    |                             |                 | Skipping meals                                                | Increase        |                                     |                                      |                                                                     |                 |
|                          |      |                                                       |                                                                                       |                              |                    |                             |                 | Traveling                                                     | Increase        |                                     |                                      |                                                                     |                 |
|                          |      |                                                       |                                                                                       |                              |                    |                             |                 | Embarrassment in the public (injection)                       | Increase        |                                     |                                      |                                                                     |                 |
| Portelli MS et al.       | 2012 | 43 patients with HIV/AIDS                             | Focus group interviews                                                                | Stigmatization               | Increase           |                             |                 |                                                               |                 |                                     | Long distance to the treating center | Increase                                                            |                 |
| Rushworth GF et al.      | 2012 | 20 patients after PCI                                 | "Face-to-face"-Interviews                                                             |                              |                    |                             |                 | Awareness about the consequences of not taking the medication | Decrease        |                                     |                                      | Good Physician-patient-relationship                                 | Decrease        |
|                          |      |                                                       |                                                                                       |                              |                    |                             |                 | Awareness of the treatment benefit                            | Decrease        |                                     |                                      |                                                                     |                 |
|                          |      |                                                       |                                                                                       |                              |                    |                             |                 | Fear of side effects                                          | Increase        |                                     |                                      |                                                                     |                 |
| Saks EK et al.           | 2012 | 160 patients with urinary incontinence                | Cross-sectional survey                                                                |                              |                    |                             |                 | General belief that drugs are too often used                  | Increase        |                                     |                                      |                                                                     |                 |
| Schoenthaler AM et al.   | 2012 | 608 patients with DM and 41 physician                 | Cross-sectional survey                                                                | Longer duration of disease   | Increase           |                             |                 | Belief in the need of therapy                                 | Decrease        | Subcutaneous application (vs. oral) | Increase                             | Satisfaction with the ability of the physician to explain something | Decrease        |
| Thames AD et al.         | 2012 | 181 patients with HIV/AIDS                            | Follow-up-study                                                                       | Lack of social support       | Increase           | Depression                  | Increase        |                                                               |                 |                                     |                                      | Satisfaction with the physician                                     | Decrease        |
| Tobi P et al.            | 2012 | 701 chronically ill patients                          | Investigation based on administrative data                                            | Older age                    | Decrease           |                             |                 |                                                               |                 |                                     |                                      |                                                                     |                 |
| Wasti SP et al.          | 2012 | 330 Patients with HIV/AIDS and 34 other "Stakeholder" | Cross-sectional survey and in-depth interviews                                        | Female gender                | Increase           | Regular alcohol consumption | Increase        | Lack of disease knowledge                                     | Increase        | Side effects                        | Increase                             | Long distance to the treating center                                | Increase        |
|                          |      |                                                       |                                                                                       | Analphabeticisms             | Increase           |                             |                 | Negative attitudes to therapy                                 | Increase        |                                     |                                      |                                                                     |                 |
| Wiegand P et al.         | 2012 | 88.635 patients with first prescription of Statin     | Investigation based on administrative data                                            | Older age (> 75 vs. 45 - 55) | Decrease           |                             |                 |                                                               |                 |                                     |                                      | Visiting of only one physician                                      | Decrease        |
|                          |      |                                                       |                                                                                       | Female gender                | Increase           |                             |                 |                                                               |                 |                                     |                                      | Visiting of only one physician                                      | Decrease        |
| Alison Phillips L et al. | 2013 | 71 patients with hypertonia                           | Prospective cohort study                                                              |                              |                    |                             |                 | "Bad" habits have been influenced by prior therapy experience | Increase        |                                     |                                      |                                                                     |                 |
| Bressington D et al.     | 2013 | 584 patients with schizophrenia                       | Cross-sectional survey                                                                |                              |                    |                             |                 | Positive attitudes to therapy                                 | Decrease        | Side effects                        | Increase                             |                                                                     |                 |
|                          |      |                                                       |                                                                                       |                              |                    |                             |                 | Awareness of the need of therapy                              | Decrease        |                                     |                                      |                                                                     |                 |
| Curkendall SM et al.     | 2013 | Patients with DM2                                     | Investigation based on administrative data                                            | Female gender                | Increase           |                             |                 |                                                               |                 | poly-pharmacy                       | Unclear / variable                   | Mail-order use                                                      | Decrease        |
|                          |      |                                                       |                                                                                       | Older age                    | Decrease           |                             |                 |                                                               |                 |                                     |                                      | Lower lever of cost sharing                                         | Decrease        |
|                          |      |                                                       |                                                                                       | Number of comorbidities      | Unclear            |                             |                 |                                                               |                 |                                     |                                      |                                                                     |                 |
| Evon DM et al.           | 2013 | 242 patients with HCV                                 | Prospective cohort study                                                              | Older age                    | Decrease           | Depression                  | Increase        |                                                               |                 | Side effects                        | Increase                             | Private insurance                                                   | Decrease        |
|                          |      |                                                       |                                                                                       | Unemployment                 | Unclear / variable |                             |                 |                                                               |                 |                                     |                                      |                                                                     |                 |
|                          |      |                                                       |                                                                                       | African-American             | Increase           |                             |                 |                                                               |                 |                                     |                                      |                                                                     |                 |
|                          |      |                                                       |                                                                                       | Unmarried                    | Increase           |                             |                 |                                                               |                 |                                     |                                      |                                                                     |                 |
|                          |      |                                                       |                                                                                       | Low level of education       | Increase           |                             |                 |                                                               |                 |                                     |                                      |                                                                     |                 |
| Girotto E et al.         | 2013 | 385 patients with hypertonia                          | Cross-sectional study                                                                 | Older age (50 - 79)          | Decrease           | Regular alcohol consumption | Increase        |                                                               |                 |                                     |                                      | At least one physician consultation per year                        | Decrease        |
|                          |      |                                                       |                                                                                       | Previous heart attack        | Decrease           |                             |                 |                                                               |                 |                                     |                                      |                                                                     |                 |
| Gonzalez A et al.        | 2013 | 121 patients with HIV/AIDS                            | Cross-sectional study with written questionnaires                                     |                              |                    | Drug addiction              | Increase        |                                                               |                 |                                     |                                      |                                                                     |                 |
| Hanif H et al.           | 2013 | 632 patients with HIV/AIDS                            | Cross-sectional study with written questionnaires                                     | Female gender                | Increase           |                             |                 |                                                               |                 |                                     |                                      |                                                                     |                 |
|                          |      |                                                       |                                                                                       | Great social support         | Decrease           |                             |                 |                                                               |                 |                                     |                                      |                                                                     |                 |
|                          |      |                                                       |                                                                                       | Higher Asset Index           | Decrease           |                             |                 |                                                               |                 |                                     |                                      |                                                                     |                 |

Additional file 2: Overview – Review of literature regarding factors associated with medication related non-adherence (2011-2013)

| Author(s)           | Year | Sample                                    | Design                                            | Patient related factors               |                 |                             |                 |                                                 |                 | Medication related factors             | Influence on NA | Health care system related factors               |          | Influence on NA |
|---------------------|------|-------------------------------------------|---------------------------------------------------|---------------------------------------|-----------------|-----------------------------|-----------------|-------------------------------------------------|-----------------|----------------------------------------|-----------------|--------------------------------------------------|----------|-----------------|
|                     |      |                                           |                                                   | Socio-demographic                     | Influence on NA | Unintentional               | Influence on NA | Intentional                                     | Influence on NA |                                        |                 |                                                  |          |                 |
| Jónsdóttir H et al. | 2013 | 255 patients with bipolar disorder        | Cross-sectional survey                            | Higher IQ                             | Increase        | Drug addiction / Alcoholism | Increase        | Lack of insight                                 | Increase        | Side effects                           | Increase        |                                                  |          |                 |
| Lang K et al.       | 2013 | 28.238 patients with schizophrenia        | Investigation based on administrative data        |                                       |                 | Regular alcohol consumption | Increase        | Awareness about the transmission of the disease | Decrease        | Previous NA (within "Baseline"-period) | Increase        |                                                  |          |                 |
| Méda ZC et al.      | 2013 | 1.043 patients with HIV/AIDS or/and TB    | Cross-sectional study with written questionnaires | Higher number of persons in household | Increase        |                             |                 | Positive attitudes                              | Decrease        |                                        |                 | Poor access to health care for financial reasons | Increase |                 |
| Naar-King S et al.  | 2013 | 158 patients with HIV/AIDS                | Prospective cohort study                          | Stigmatization (HIV)                  | Increase        |                             |                 |                                                 |                 |                                        |                 |                                                  |          |                 |
|                     |      |                                           |                                                   | Lack of social support                | Increase        |                             |                 | Awareness of the status of disease              |                 |                                        |                 | Poor doctor-patient relationship                 | Increase |                 |
|                     |      |                                           |                                                   | African-American                      | Increase        |                             |                 |                                                 |                 |                                        |                 |                                                  |          |                 |
| Pachi A et al.      | 2013 | Patients with HIV/AIDS                    | Review                                            |                                       |                 | Depression                  | Increase        |                                                 |                 |                                        |                 |                                                  |          |                 |
| Park YH et al.      | 2013 | 241 patients with hypertonia              | "Face-to-face"-Interviews                         |                                       |                 | Forgetfulness               | Increase        |                                                 |                 |                                        |                 |                                                  |          |                 |
| Tang L et al.       | 2013 | 759 patients with coronary artery disease | Investigation based on administrative data        | Female gender                         | Increase        |                             |                 |                                                 |                 |                                        |                 |                                                  |          |                 |
|                     |      |                                           |                                                   | Hispanic/Black                        | Increase        |                             |                 |                                                 |                 |                                        |                 |                                                  |          |                 |
